# Supplementary material for: Accumulation of perchlorate in tobacco plants: development of a plant kinetic modelElectronic supplementary information (ESI) available: Tables S1 and S2 showing perchlorate content in tobacco plants and solutions and Figs S1 and S2 showing mean nutrient solution utilization rates and average fresh weights for perchlorate-amended plants. See http://www.rsc.org/suppdata/em/b3/b300570d/
Source: Royal Society of Chemistry journal article supplement (doi:10.1039/b300570d), 2003-01-01
Supplement: tables and figs.doc [file tables%20and%20figs.doc]

**This journal is ©The Royal Society of Chemisty**

**Table S1**: Perchlorate content in tobacco plants and solution.

|  | **mg ClO4-** | | | |
| --- | --- | --- | --- | --- |
| **Plant** | **Leaf** | **Stem** | **Root** | **Solution** |
|  |  |  |  |  |
| 25ppma Day 1 | 3.1 ± 0.3b | 0.5 ± 0.1 | 1.1 ± 0.2 | 16.7 ± 0.4 |
|  |  |  |  |  |
| 25ppm Day 3 | 10.4 ± 1.0 | 0.8 ± < 0.1 | 0.8 ± < 0.1 | 9.8 ± 0.5 |
|  |  |  |  |  |
| 25ppm Day 5 | 13.6 ± 0.9 | 0.7 ± < 0.1 | 0.7 ± 0.1 | 4.9 ± 1.4 |
|  |  |  |  |  |
| 25ppm Day 7 | 16.3 ± 0.9 | 0.7 ± 0.1 | 0.3 ± < 0.1 | 2.3 ± 0.9 |
|  |  |  |  |  |
| 25ppm Day 9 | 18.3 ± 1.0 | 0.6 ± < 0.1 | 0.3 ± 0.1 | 1.1 ± 0.1 |
|  |  |  |  |  |
| 25ppm Day 11 | 18.0 ± 0.4 | 0.6 ± < 0.1 | 0.2 ± < 0.1 | 0.9 ± 0.1 |
|  |  |  |  |  |
| 25ppm Day 13 | 18.3 ± 1.5 | 0.7 ± 0.1 | 0.27 ± < 0.1 | 0.4 ± 0.5 |
|  |  |  |  |  |
| 75ppmc Day 1 | 8.2 ± 0.3 | 1.4 ± 0.1 | 2.7 ± 0.2 | 47.8 ± 1.8 |
|  |  |  |  |  |
| 75ppm Day 3 | 23.9 ± 0.5 | 1.9 ± 0.2 | 2.4 ± 0.2 | 31.3 ± 1.1 |
|  |  |  |  |  |
| 75ppm Day 5 | 37.9 ± 1.6 | 1.9 ± 0.3 | 1.4 ± 0.5 | 16.4 ± 0.3 |
|  |  |  |  |  |
| 75ppm Day 7 | 40.8 ± 1.01 | 1.8 ± 0.1 | 1.0 ± < 0.1 | 15.0 ± 3.5 |
|  |  |  |  |  |
| 75ppm Day 9 | 48.6 ± 1.0 | 1.7 ± < 0.1 | 0.7 ± 0.1 | 4.5 ± 0.2 |
|  |  |  |  |  |
| 75ppm Day 11 | 53.0 ± 1.9 | 1.6 ± < 0.1 | 0.7 ± 0.1 | 3.7 ± 1.0 |
|  |  |  |  |  |
| 75ppm Day 13 | 54.4 ± 2.8 | 1.2 ± 0.1 | 0.3 ± < 0.1 | 2.5 ± 1.4 |

a Actual initial ClO4- concentration was 25.2 ppm (20.1 mg).

b Milligrams ClO4- ± standard deviation, n=2.

c Actual initial ClO4- concentration was 75.4 ppm (60.3 mg).

**Table S2:** Perchlorate concentration in tobacco plants and solution.

|  | **ppm ClO4- (Dry and Fresh Weight Basis)** | | | | | | **ppm ClO4-** |
| --- | --- | --- | --- | --- | --- | --- | --- |
|  | **Leaf** | | **Stem** | | **Root** | | **Solution** |
| **Plant** | **Dry** | **Fresh** | **Dry** | **Fresh** | **Dry** | **Fresh** |  |
|  |  |  |  |  |  |  |  |
| 25ppma Day 1 | 368.3 ±14.2b | 53.3 ± 1.9 | 226.6 ± 34.2 | 30.0 ± 0.7 | 770.1 ± 9.4 | 55.7 ± 3.3 | 20.9 ± 0.5 |
|  |  |  |  |  |  |  |  |
| 25ppm Day 3 | 1000.3 ± 26.6 | 143.8 ± 10.1 | 287.2 ± 12.6 | 35.3 ± 2.3 | 458.1 ± 70.5 | 35.4 ± 6.6 | 12.2 ± 0.6 |
|  |  |  |  |  |  |  |  |
| 25ppm Day 5 | 1401.3 ± 108.8 | 188.3 ± 3.5 | 220.6 ± 21.1 | 25.4 ± 3.5 | 374.9 ± 85.1 | 28.1 ± 4.8 | 6.1 ± 1.7 |
|  |  |  |  |  |  |  |  |
| 25ppm Day 7 | 1268.7 ± 72.0 | 175.8 ± 5.6 | 160.9 ± 11.5 | 19.3 ± 1.6 | 153.0 ± 32.9 | 12.4 ± 3.5 | 2.9 ± 1.1 |
|  |  |  |  |  |  |  |  |
| 25ppm Day 9 | 1469.4 ± 38.8 | 187.87 ± 1.2 | 140.4 ± 36.9 | 16.4 ± 3.0 | 103.7 ± 5.8 | 9.6 ± 0.8 | 1.4 ± 0.1 |
|  |  |  |  |  |  |  |  |
| 25ppm Day 11 | 1336.2 ± 20.5 | 149.3 ± 23.9 | 107.8 ± 6.4 | 13.0 ± 0.2 | 85.6 ± 3.2 | 8.8 ± 0.6 | 1.1 ± 0.2 |
|  |  |  |  |  |  |  |  |
| 25ppm Day 13 | 1122.1 ± 7.7 | 143.3 ± 4.4 | 88.2 ± 2.0 | 11.5 ± 0.2 | 76.0 ± 8.1 | 6.5 ± 1.3 | 0.5 ± 0.7 |
|  |  |  |  |  |  |  |  |
| 75ppmc Day 1 | 957.9 ± 98.5 | 134.3 ± 3.6 | 627.7 ± 84.1 | 75.6 ± 6.9 | 1870.0 ± 100.3 | 134.1 ± 8.7 | 59.8 ± 2.2 |
|  |  |  |  |  |  |  |  |
| 75ppm Day 3 | 2536.4 ± 178.5 | 354.3 ± 41.2 | 783.0 ± 1.6 | 89.6 ± 4.7 | 1319.4 ± 55.4 | 102.9 ± 7.2 | 39.2 ± 1.3 |
|  |  |  |  |  |  |  |  |
| 75ppm Day 5 | 3567.3 ± 168.0 | 452.3 ± 1.4 | 616.7 ± 137.2 | 70.0 ± 9.7 | 686.1 ± 153.8 | 52.5 ± 6.8 | 20.5 ± 0.3 |
|  |  |  |  |  |  |  |  |
| 75ppm Day 7 | 3207.0 ± 131.2 | 457.8 ± 4.9 | 428.5 ± 23.1 | 50.4 ± 0.2 | 481.2 ± 14.0 | 42.9 ± 0.1 | 18.7 ± 4.3 |
|  |  |  |  |  |  |  |  |
| 75ppm Day 9 | 3181.8 ± 384.1 | 428.0 ± 76.9 | 304.9 ± 60.3 | 34.9 ± 5.4 | 242.4 ± 29.8 | 25.2 ± 2.2 | 5.6 ± 0.2 |
|  |  |  |  |  |  |  |  |
| 75ppm Day 11 | 3700.9 ± 33.9 | 472.9 ± 5.8 | 260.2 ± 46.2 | 32.1 ± 5.4 | 238.0 ± 39.2 | 24.1 ± 3.2 | 4.6 ± 1.2 |
|  |  |  |  |  |  |  |  |
| 75ppm Day 13 | 3559.0 ± 419.6 | 469.3 ± 53.1 | 173.4 ± 31.4 | 22.7 ± 4.7 | 114.1 ± 29.5 | 12.0 ± 3.0 | 3.1 ± 1.7 |

a Actual initial ClO4- concentration was 25.2 ppm (20.1 mg).

b Dry and fresh weights ± standard deviation, n=2.

c Actual initial ClO4- concentration was 75.4 ppm (60.3 mg).

**Figure S1:** Mean nutrient solution utilization rate of 25 ppm and 75 ppm perchlorate amended plants from 13-day hydroponics study (n = 4).

**Figure S2:** Average fresh weights of 25 ppm and 75 ppm perchlorate amended plants from 13-day hydroponics study (n = 4). Error bars indicate standard deviations.
